# Supplementary material
Source: PubMed Central journal article supplement (PMC3794668)
Supplement: NIHMS506021-supplement-eFigures.pdf [file NIHMS506021-supplement-eFigures.pdf]

## Supplementary Online Content

Perlis RH, Uher R, Ostacher M, Goldberg JF, Trivedi MH, Rush AJ, Fava M. Association between bipolar spectrum features and treatment outcomes in outpatients with major depressive disorder. *Arch Gen Psychiatry*. 2010;66(12):10.1001/archgenpsychiatry.2010.179.

**eFigure 1.** Proposed structural equation model for association between latent bipolar variable and treatment resistance in major depressive disorder. The figure summarizes the structure assumed in a structural equation model examining association between a latent bipolar variable and failure to remit with multiple treatment trials in major depressive disorder. Both treatment resistance and bipolar liability are assumed to be latent variables which can be estimated based on observed variables (treatment response, for resistance, and bipolar spectrum features, for bipolar liability.) See text for details.

**eFigure 2.** Results of structural equation model for association between latent bipolar variable and treatment resistance in major depressive disorder. The figure superimposes results from fitting a model for the association between latent bipolar variable and treatment resistance in major depressive disorder. Numbers at the bottom (“Loading:”) show loading of individual bipolar spectrum features on the latent bipolar spectrum variable.

**eFigure 3.** Results of structural equation model for association between latent bipolar variable and absence of postbaseline visits. The figure superimposes results from fitting a model for the association between latent bipolar variable and failure to return following baseline study visit. Numbers at the bottom show loading of individual bipolar spectrum features on the latent bipolar spectrum variable.

**eFigure 4.** Results of structural equation model for association between latent bipolar variable and loss to follow-up. The figure superimposes results from fitting a model for the association between latent bipolar variable and loss to follow-up. Numbers at the bottom show loading of individual bipolar spectrum features on the latent bipolar spectrum variable.

**eFigure 5.** Results of structural equation model for association between latent bipolar variable and serious psychiatric adverse events in major depressive disorder. The figure superimposes results from fitting a model for the association between latent bipolar variable and serious psychiatric adverse event. Numbers at the bottom show loading of individual bipolar spectrum features on the latent bipolar spectrum variable.

**eTable 1.** Association between individual bipolar spectrum features and hazard for remission across levels in STAR\*D – alternate model using time-to-event, rather than levels-to-event.

**eTable 2.** PDSQ psychosis screen items endorsed by STAR\*D participants at study entry.

**eTable 3.** Association between potential sociodemographic and clinical confounding variables and remission. These include age, sex, treatment setting (primary versus specialty), ethnicity and race, marital status, payor type, education, depression severity, and comorbid panic disorder, alcohol use disorder, or substance use disorder.

**eTable 4.** Correlations between putative indicators of latent bipolarity.

**eTable 5.** Measurement model fit and psychometric indices.

**eTable 6.** Properties of bipolar trait indicators in a measurement model,

**eTable 7.** Association between potential sociodemographic and clinical confounding variables and adverse events.

This supplementary material has been provided by the authors to give readers additional information about their work.

eFigure 1.  
Proposed  
model

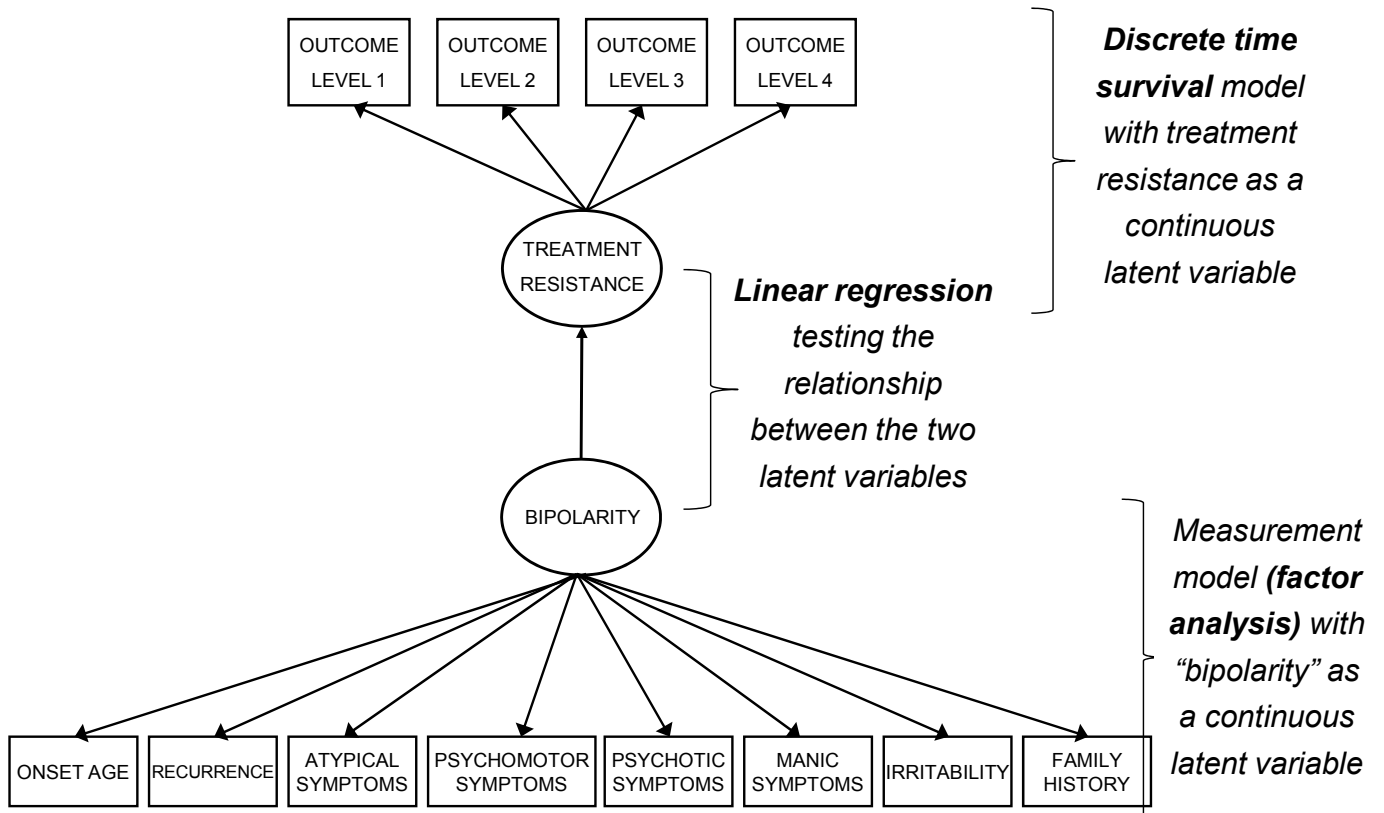

1

eFigure 2.  
Model for  
treatment  
resistance

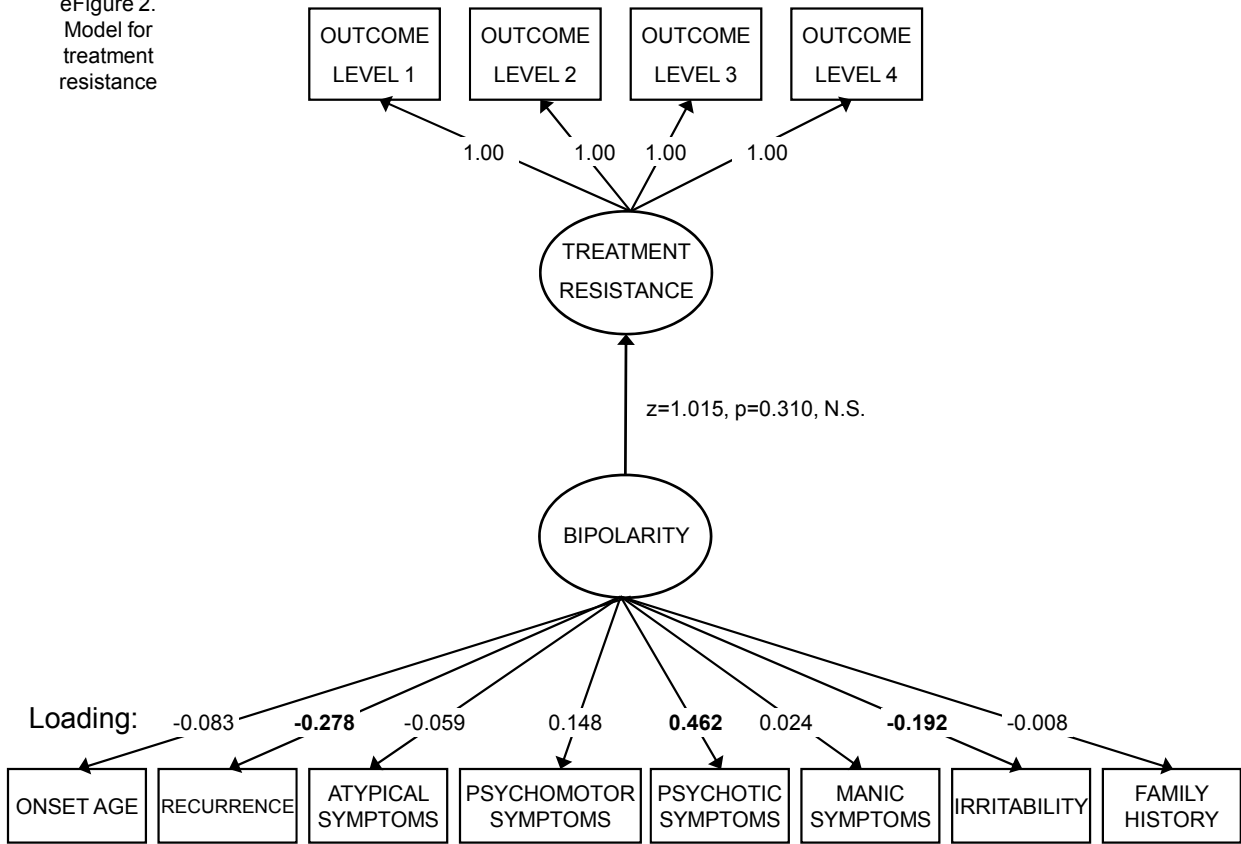

2  
3  
4

1

eFigure 3. Model for no post-baseline visit

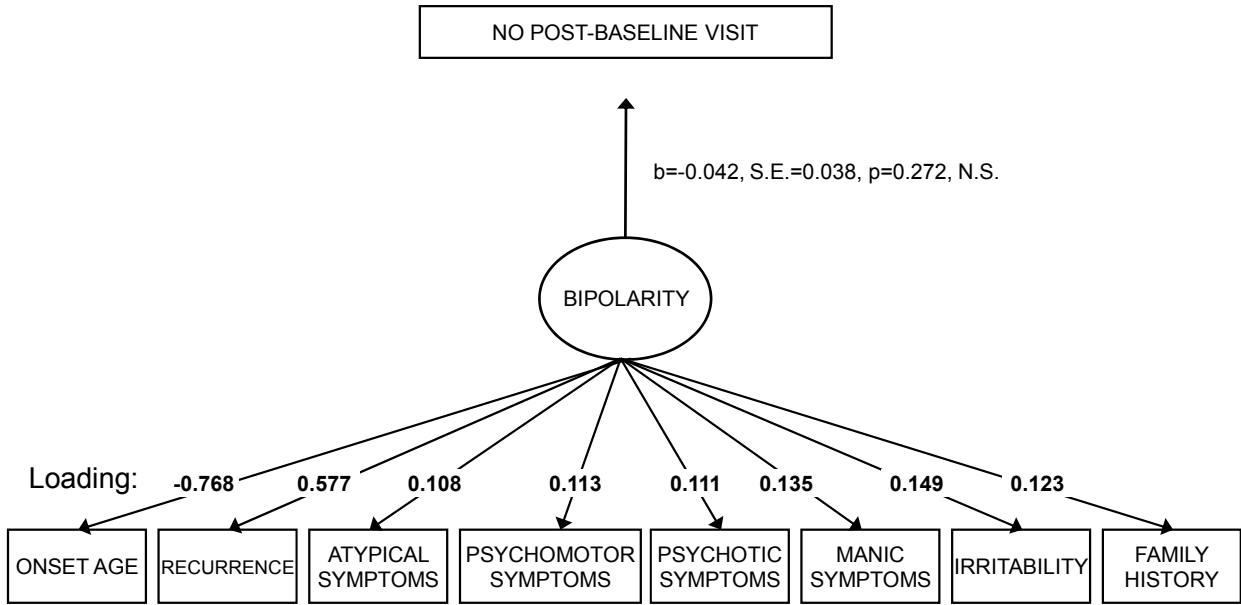

2  
3  
4

1

eFigure 4. Model for loss to follow-up

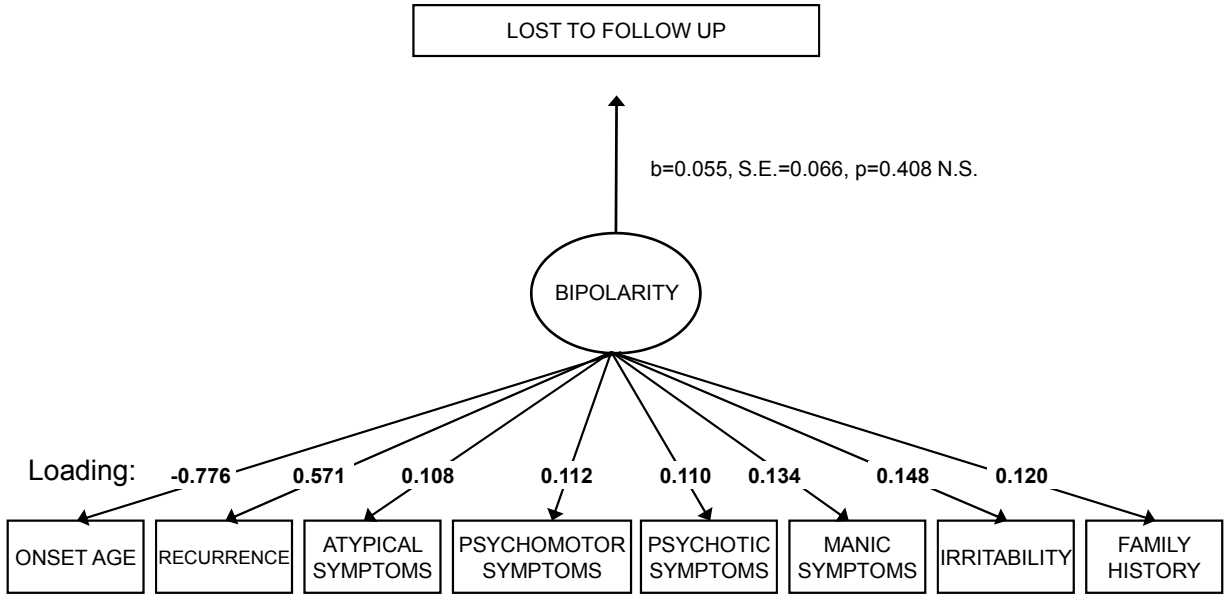

2  
3  
4

eFigure 5. Model for psychiatric adverse event

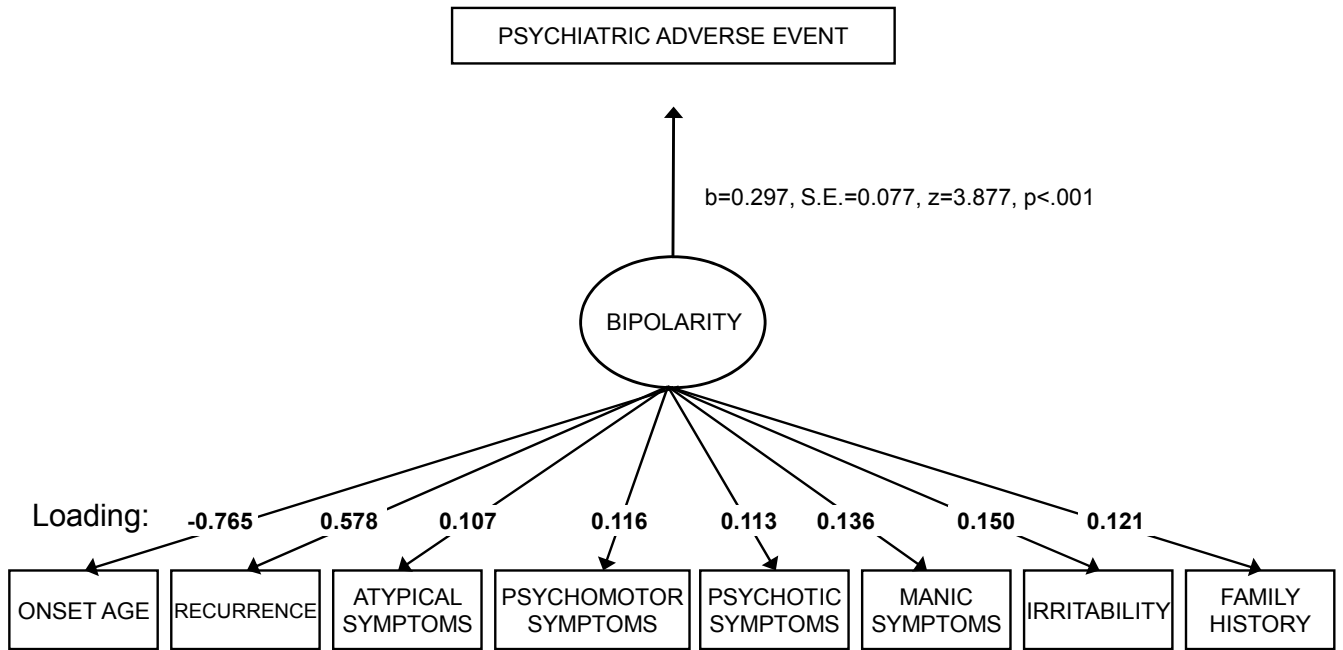

**eTable 1.** Association between individual bipolar spectrum features and hazard for remission across levels in STAR\*D (alternate model using time-to-event, rather than levels-to-event).

| Feature                               | crude |           |   | adjusted |           |   |
|---------------------------------------|-------|-----------|---|----------|-----------|---|
|                                       | HR    | 95% CI    | * | HR       | 95% CI    | * |
| Family history - bipolar              | 0.99  | 0.85-1.15 |   | 0.98     | 0.84-1.14 |   |
| Episode duration ≤ 3 mo               | 1.20  | 1.09-1.33 | * | 1.21     | 1.09-1.34 | * |
| 3 or more prior episodes              | 0.92  | 0.84-1.01 |   | 0.92     | 0.83-1.01 |   |
| Onset before age 25                   | 1.00  | 0.92-1.09 |   | 0.97     | 0.88-1.07 |   |
| Atypical depression (DSM-IV)          | 0.78  | 0.69-0.88 | * | 0.79     | 0.70-0.90 | * |
| Manic-like symptoms (1+)              | 1.01  | 0.93-1.11 |   | 1.03     | 0.94-1.12 |   |
| Manic-like symptoms (2+)              | 1.10  | 0.99-1.22 |   | 1.12     | 1.01-1.25 | * |
| Manic-like symptoms (3+)              | 1.22  | 1.06-1.39 | * | 1.25     | 1.09-1.44 | * |
| Psychosis-like symptoms (1+)          | 0.77  | 0.69-0.85 | * | 0.81     | 0.73-0.90 | * |
| Psychosis-like symptoms (2+)          | 0.68  | 0.58-0.79 | * | 0.74     | 0.63-0.86 | * |
| Psychosis-like symptoms (3+)          | 0.76  | 0.60-0.97 | * | 0.87     | 0.68-1.11 |   |
| Bipolar spectrum illness <sup>^</sup> | 0.92  | 0.82-1.02 |   | 0.91     | 0.81-1.01 |   |
|                                       |       |           |   |          |           |   |
| IDS~: irritability                    | 0.88  | 0.83-0.93 | * | 0.87     | 0.82-0.91 | * |
| IDS: slowing                          | 0.80  | 0.74-0.86 | * | 0.81     | 0.75-0.88 | * |
| IDS: agitation                        | 0.83  | 0.79-0.89 | * | 0.84     | 0.79-0.89 | * |
| IDS: hypersomnia                      | 0.93  | 0.88-0.97 | * | 0.91     | 0.86-0.96 | * |
| IDS: increased appetite               | 0.89  | 0.85-0.94 | * | 0.90     | 0.85-0.94 | * |
| Onset age (years)                     | 1.00  | 1.00-1.00 |   | 1.00     | 1.00-1.01 |   |
| PDSQ~ mania-like score                | 1.04  | 1.00-1.07 | * | 1.04     | 1.01-1.08 | * |
| PDSQ psychosis-like score             | 0.86  | 0.81-0.91 | * | 0.89     | 0.84-0.94 | * |

<sup>^</sup> Bipolar spectrum defined by Ghaemi and Goodwin criteria; see text for details

~ IDS: Inventory of Depressive Symptoms; PDSQ: Psychiatric Diagnostic Screening Questionnaire

\* 95% CI excludes 1 (i.e., p<0.05)



**eTable 2. PDSQ psychosis-like screen items endorsed by STAR\*D participants (n=3,999)^**

| Item                                            | n   | %    |
|-------------------------------------------------|-----|------|
| Told things that happened were your imagination | 501 | 12.5 |
| Convinced others were spying                    | 827 | 20.7 |
| Someone was plotting to harm you                | 278 | 7.0  |
| Special powers                                  | 102 | 2.6  |
| Controlled by outside force                     | 128 | 3.2  |
| Seeing or hearing things                        | 228 | 5.7  |

^ Refers to patient-reported symptoms in the 2 weeks prior to study entry; see text for details.  
PDSQ, Psychiatric Diagnosis Screening Questionnaire

**eTable 3. Sociodemographic and clinical features examined for association with remission hazard**

| Feature                              | HR   | 95% CI    |
|--------------------------------------|------|-----------|
| Ham-D total score                    | 0.95 | 0.94-0.96 |
| Male gender                          | 0.98 | 0.90-1.07 |
| Age (in decades)                     | 0.98 | 0.95-1.01 |
| Primary care (versus specialty) site | 1.04 | 0.95-1.14 |
| White (vs non)                       | 1.37 | 1.22-1.54 |
| Hispanic (vs non)                    | 0.99 | 0.87-1.13 |
| Married (current)                    | 1.16 | 1.06-1.27 |
| Public insurance                     | 0.79 | 0.70-0.90 |
| Did not graduate high school         | 0.84 | 0.73-0.96 |
| Panic disorder (by PDSQ)             | 0.70 | 0.63-0.77 |
| Substance use disorder (by PDSQ)     | 0.88 | 0.75-1.02 |
| Alcohol use disorder (by PDSQ)       | 1.01 | 0.91-1.11 |

\* 95% CI excludes 1 (i.e.,  $p < 0.05$ )

PDSQ, Psychiatric Diagnosis Screening Questionnaire

**eTable 4: Correlations between putative indicators of latent bipolarity.** The non-parametric Spearman's rank correlation coefficients are given.

|                           |        | yonage | recc | atyp  | psymot | psych | man  | iirtb | bip |
|---------------------------|--------|--------|------|-------|--------|-------|------|-------|-----|
| Age of onset (younger)    | yonage |        |      |       |        |       |      |       |     |
| Recurrence                | recc   | 0.48   |      |       |        |       |      |       |     |
| Atypical symptoms         | atyp   | 0.10   | 0.04 |       |        |       |      |       |     |
| Psychomotor symptoms      | psymot | 0.04   | 0.05 | -0.02 |        |       |      |       |     |
| Psychotic-like symptoms   | psych  | 0.05   | 0.01 | 0.00  | 0.22   |       |      |       |     |
| Manic-like symptoms       | man    | 0.07   | 0.03 | 0.00  | 0.11   | 0.22  |      |       |     |
| Irritability              | iirtb  | 0.08   | 0.02 | 0.03  | 0.20   | 0.15  | 0.09 |       |     |
| Family history of bipolar | bip    | 0.09   | 0.06 | 0.02  | 0.05   | 0.03  | 0.02 | 0.02  |     |

**eTable 5: Measurement model fit and psychometric indices.**

| Index/Criterion      | value    |
|----------------------|----------|
| Cronbach alpha       | 0.14     |
| Covariance explained | 0.74     |
| CFI                  | 0.54     |
| TLI                  | 0.39     |
| RMSEA                | 0.09     |
| WRMR                 | 3.54     |
| AIC                  | 89644.08 |
| BIC                  | 89776.47 |
| BICadj               | 89709.74 |

CFI, comparative fit index; TLI, Tucker-Lewis index; RMSEA, root mean square error of approximation; WRMR, weighted root mean square residual

AIC, Akaike's information criterion; BIC, Bayesian information criterion; BICadj, Bayesian information criterion (adjusted)

**eTable 6: Properties of bipolar trait indicators in a measurement model.** Inter-item covariance is the standardized average covariance with all other items. Item-rest correlation (also termed adjusted item-total correlation) is the correlation with a scale constructed with all items except the item under examination. Common factor loading is the standardized factor loading from a one-factor confirmatory factor analysis model.

|                           | Inter-item covariance | Item-rest correlation | Common factor loading | Percentage covariance explained by common factor | Percentage variance explained by common factor (R <sup>2</sup> ) |
|---------------------------|-----------------------|-----------------------|-----------------------|--------------------------------------------------|------------------------------------------------------------------|
| Age of onset (younger)    | 0.04                  | 0.28                  | 0.78                  | 0.59                                             | 0.28                                                             |
| Recurrence                | 0.28                  | 0.41                  | 0.57                  | 0.56                                             | 0.18                                                             |
| Atypical symptoms         | 0.62                  | 0.08                  | 0.11                  | 0.62                                             | 0.02                                                             |
| Psychomotor symptoms      | 0.65                  | 0.07                  | 0.11                  | 0.80                                             | 0.31                                                             |
| Psychotic-like symptoms   | 0.68                  | 0.07                  | 0.14                  | 0.80                                             | 0.37                                                             |
| Manic-like symptoms       | 0.67                  | 0.10                  | 0.16                  | 0.85                                             | 0.20                                                             |
| Irritability              | 0.63                  | 0.12                  | 0.15                  | 0.88                                             | 0.27                                                             |
| Family history of bipolar | 0.69                  | 0.09                  | 0.23                  | 0.78                                             | 0.06                                                             |
| Total                     | 0.53                  | 0.14                  | 0.28                  | 0.74                                             | 0.21                                                             |

**eTable 7.** Sociodemographic and clinical features examined for association with odds of adverse outcomes

| Feature                              | Early discontinuation |           |   | Loss to follow-up |           |   | Adverse event |           |   |
|--------------------------------------|-----------------------|-----------|---|-------------------|-----------|---|---------------|-----------|---|
|                                      | OR                    | 95% CI    |   | OR                | 95% CI    | * | OR            | 95% CI    | * |
| Ham-D total score                    | 1.01                  | 0.99-1.03 |   | 1.07              | 1.05-1.10 | * | 1.13          | 1.09-1.18 | * |
| Male gender                          | 0.81                  | 0.65-1.02 |   | 0.93              | 0.73-1.18 |   | 1.44          | 0.93-2.22 |   |
| Age (in decades)                     | 0.99                  | 0.98-0.99 | * | 0.98              | 0.97-0.99 | * | 0.97          | 0.96-0.99 | * |
| Primary care (versus specialty) site | 1.41                  | 1.14-1.75 | * | 1.41              | 1.11-1.77 | * | 0.68          | 0.42-1.09 |   |
| White (vs non)                       | 0.67                  | 0.52-0.85 | * | 0.59              | 0.46-0.76 | * | 0.78          | 0.47-1.28 |   |
| Hispanic (vs non)                    | 1.28                  | 0.95-1.73 |   | 1.45              | 1.06-1.99 | * | 1.44          | 0.81-2.58 |   |
| Married                              | 0.82                  | 0.64-1.03 |   | 0.64              | 0.49-0.83 | * | 1.00          | 0.63-1.58 |   |
| Public insurance                     | 1.84                  | 1.45-2.35 | * | 1.39              | 1.05-1.84 | * | 1.33          | 0.78-2.25 |   |
| Did not graduate high school         | 1.98                  | 1.51-2.59 | * | 1.59              | 1.16-2.17 | * | 1.12          | 0.59-2.12 |   |
| Panic disorder (by PDSQ)             | 1.62                  | 1.30-2.01 | * | 1.93              | 1.52-2.43 | * | 2.15          | 1.40-3.32 | * |
| Substance use disorder (by PDSQ)     | 1.47                  | 1.08-2.02 | * | 1.40              | 0.99-1.98 |   | 2.45          | 1.44-4.17 | * |
| Alcohol use disorder (by PDSQ)       | 0.90                  | 0.70-1.17 |   | 1.29              | 1.00-1.68 |   | 1.29          | 0.80-2.09 |   |

Ham-D, Hamilton Rating Scale of Depression Severity

PDSQ, Psychiatric Diagnosis Screening Questionnaire

\* 95% CI excludes 1 (i.e.,  $p < 0.05$ )
